# Supplementary material for: Germplasm Innovation and Establishment of Comprehensive Evaluation System for Hedgerow Garden Chrysanthemum
Source: MDPI journal article supplement (doi:10.3390/agronomy12081736), 2022-07-22
Supplement: s1 [file s1]

**Table S1.** Correlation analysis results of quantitative characters of F1 generati.

| Traits                                       | Plant height | Crown width | Crown height ratio | Number of main branches | Inflorescence diameter | Number of ray florets | Number of flowers per plant | Days from planting period to coloring period | Days of florescence |
|----------------------------------------------|--------------|-------------|--------------------|-------------------------|------------------------|-----------------------|-----------------------------|----------------------------------------------|---------------------|
| Plant height                                 | 1            |             |                    |                         |                        |                       |                             |                                              |                     |
| Crown width                                  | 0.56**       | 1           |                    |                         |                        |                       |                             |                                              |                     |
| Crown height ratio                           | -0.35**      | 0.51**      | 1                  |                         |                        |                       |                             |                                              |                     |
| Number of main branches                      | 0.18**       | 0.30**      | 0.128**            | 1                       |                        |                       |                             |                                              |                     |
| Inflorescence diameter                       | 0.17**       | -0.05       | -0.200**           | 0.06                    | 1                      |                       |                             |                                              |                     |
| Number of ray florets                        | 0.08*        | -0.12**     | -0.201**           | 0.01                    | -0.01                  | 1*                    |                             |                                              |                     |
| Number of flowers per plant                  | 0.45**       | 0.71**      | 0.271**            | 0.21**                  | -0.24**                | -0.08**               | 1**                         |                                              |                     |
| Days from planting period to coloring period | -0.32**      | -0.27**     | 0.035              | -0.08*                  | 0.4                    | -0.29**               | -0.24**                     | 1                                            |                     |
| Days of florescence                          | 0.18**       | 0.14**      | -0.020             | 0.08*                   | 0.08*                  | 0.42**                | 0.09**                      | -0.71                                        | 1*                  |

\*\* and \* indicate significant different at 0.01 and 0.05 probability level, respectively.

**Table S2.** Genetic statistical analysis of plant height of hybrids.

| Combination | Height of parents/cm |             |                  | Height of hybrids/cm |      |          | Comparison of hybrids and parents |                      |                |                     |
|-------------|----------------------|-------------|------------------|----------------------|------|----------|-----------------------------------|----------------------|----------------|---------------------|
|             | Female parent        | Male parent | Mid-parent value | $\bar{X} \pm \sigma$ | CV   | Extremum | $\bar{X}/P$                       | Less than low parent | Between parent | Greater than parent |
| CH          | 39                   | 42          | 40.5             | 30.7±7.2             | 0.24 | 17-51    | 75.7                              | 86.3                 | 8.8            | 5.0                 |
| CY          | 39                   | 38          | 38.5             | 31.7±8.2             | 0.26 | 18-69    | 82.4                              | 80.0                 | 5.0            | 15.0                |
| CQ          | 39                   | 45          | 42.0             | 32.4±8.1             | 0.25 | 11-51    | 77.2                              | 76.3                 | 6.3            | 17.5                |
| YQ          | 38                   | 45          | 41.5             | 34.8±8.6             | 0.25 | 17-55    | 83.8                              | 61.3                 | 13.8           | 25.0                |
| YH          | 38                   | 37          | 37.5             | 35.7±8.7             | 0.25 | 17-65    | 95.1                              | 56.3                 | 7.5            | 36.3                |
| YF          | 38                   | 41          | 39.5             | 27.4±7.9             | 0.29 | 13-49    | 69.4                              | 86.3                 | 1.3            | 12.5                |
| QF          | 45                   | 41          | 43.0             | 29.6±8.6             | 0.29 | 10-48    | 68.9                              | 85.0                 | 3.8            | 11.3                |
| QY          | 45                   | 38          | 41.5             | 30.3±11.0            | 0.37 | 9-50     | 73.1                              | 66.7                 | 21.2           | 12.1                |
| QS          | 45                   | 35          | 40.0             | 28.1±12.7            | 0.46 | 7-53     | 70.3                              | 59.6                 | 21.3           | 19.1                |
| HY          | 37                   | 38          | 37.5             | 38.3±9.5             | 0.25 | 15-61    | 102.2                             | 42.5                 | 12.5           | 45.0                |
| HF          | 37                   | 41          | 39.0             | 32.9±8.6             | 0.26 | 14-55    | 84.3                              | 69.6                 | 13.9           | 16.5                |
| YY          | 42                   | 38          | 40               | 32.2±8.6             | 0.27 | 15-52    | 80.6                              | 72.0                 | 12.2           | 15.9                |
| Average     |                      |             |                  |                      |      |          | 80.2                              | 70.2                 | 10.6           | 19.2                |

Table S3. Genetic statistical analysis of crown width of hybrids.

| Combination | Crown width of parents/cm |             |                  | Crown width of hybrids/cm |      |          | Comparison of hybrids and parents% |                      |                |                     |
|-------------|---------------------------|-------------|------------------|---------------------------|------|----------|------------------------------------|----------------------|----------------|---------------------|
|             | Female parent             | Male parent | Mid-parent value | $\bar{X} \pm \sigma$      | CV   | Extremum | X/P                                | Less than low parent | Between parent | Greater than parent |
| CH          | 53                        | 41          | 47               | 45.2±11.2                 | 0.25 | 22-68    | 104.0                              | 36.3                 | 31.3           | 32.5                |
| CY          | 53                        | 49          | 51               | 48.3±10.2                 | 0.21 | 24-74    | 105.6                              | 45.7                 | 27.2           | 27.2                |
| CQ          | 53                        | 36          | 44.5             | 52.9±13.6                 | 0.26 | 15-90    | 84.2                               | 12.5                 | 37.5           | 50.0                |
| YQ          | 49                        | 36          | 42.5             | 56.8±16.1                 | 0.28 | 20-97    | 74.8                               | 13.8                 | 20.0           | 66.3                |
| YH          | 49                        | 51          | 50               | 37.6±11.0                 | 0.29 | 17-82    | 132.9                              | 78.8                 | 10.0           | 11.3                |
| YF          | 49                        | 47          | 48               | 35.1±11.8                 | 0.34 | 10-76    | 136.8                              | 75.0                 | 11.3           | 13.8                |
| QF          | 36                        | 47          | 41.3             | 52.7±15.9                 | 0.30 | 20-90    | 78.3                               | 20.0                 | 15.0           | 65.0                |
| QY          | 36                        | 49          | 42.5             | 62.1±19.3                 | 0.32 | 26-116   | 68.5                               | 17.6                 | 8.8            | 73.5                |
| QS          | 36                        | 38          | 37               | 46.1±16.9                 | 0.37 | 15-85    | 80.3                               | 23.4                 | 12.8           | 63.8                |
| HY          | 51                        | 49          | 50               | 56.0±21.4                 | 0.39 | 17-100   | 89.3                               | 37.5                 | 12.5           | 50.0                |
| HF          | 51                        | 47          | 49               | 42.7±13.9                 | 0.33 | 10-75    | 114.6                              | 58.8                 | 13.8           | 27.5                |
| YY          | 41                        | 53          | 47               | 49.4±10.9                 | 0.22 | 23-75    | 95.2                               | 24.4                 | 40.2           | 35.4                |
| Average     |                           |             |                  |                           |      |          | 97.0                               | 37.0                 | 20.0           | 43.0                |

Table S4. Genetic statistical analysis of the main branches number of hybrids.

| Combination | Number of main branches of parents |             |                  | Number of main branches of hybrids |      |          | Comparison of hybrids and parents% |                      |                |                     |
|-------------|------------------------------------|-------------|------------------|------------------------------------|------|----------|------------------------------------|----------------------|----------------|---------------------|
|             | Female parent                      | Male parent | Mid-parent value | $\bar{X} \pm \sigma$               | CV   | Extremum | X/P                                | Less than low parent | Between parent | Greater than parent |
| CH          | 3                                  | 5           | 4                | 4.7±3.1                            | 0.65 | 1-20     | 84.4                               | 21.3                 | 50.0           | 28.8                |
| CY          | 3                                  | 3           | 3                | 4.1±2.0                            | 0.49 | 1-10     | 73.0                               | 21.0                 | 40.7           | 38.3                |
| CQ          | 3                                  | 4           | 3.5              | 5.7±3.1                            | 0.55 | 1-17     | 61.5                               | 12.5                 | 26.3           | 61.3                |
| YQ          | 5                                  | 4           | 4.5              | 5.0±3.0                            | 0.61 | 1-16     | 90.5                               | 30.0                 | 23.8           | 46.3                |
| YH          | 5                                  | 7           | 6                | 5.7±2.0                            | 0.35 | 2-11     | 104.5                              | 21.3                 | 56.3           | 22.5                |
| YF          | 5                                  | 6           | 5.5              | 4.3±1.8                            | 0.42 | 2-10     | 128.6                              | 58.8                 | 32.5           | 8.8                 |
| QF          | 4                                  | 6           | 5                | 5.6±2.5                            | 0.45 | 2-17     | 88.7                               | 18.8                 | 51.3           | 30.0                |
| QY          | 4                                  | 5           | 4.5              | 5.7±1.8                            | 0.31 | 2-9      | 79.4                               | 14.7                 | 35.3           | 50.0                |
| QS          | 4                                  | 3           | 3.5              | 4.3±2.8                            | 0.65 | 1-12     | 80.6                               | 29.8                 | 27.7           | 42.6                |
| HY          | 7                                  | 5           | 6                | 5.2±2.8                            | 0.54 | 1-15     | 114.6                              | 48.8                 | 25.0           | 26.3                |
| HF          | 7                                  | 6           | 6.5              | 4.8±3.3                            | 0.68 | 1-17     | 134.5                              | 69.6                 | 13.9           | 16.5                |
| YY          | 3                                  | 5           | 4                | 5.5±3.0                            | 0.55 | 2-16     | 73.1                               | 9.8                  | 52.4           | 37.8                |
| Average     |                                    |             |                  |                                    |      |          | 92.8                               | 29.7                 | 36.3           | 34.1                |

Table S5. Genetic statistical analysis of inflorescence diameter of hybrids.

| Combination | Inflorescence diameter of parents/cm |             |                  | Inflorescence diameter of hybrids/cm |      |           | Comparison of hybrids and parents% |                      |                |                     |
|-------------|--------------------------------------|-------------|------------------|--------------------------------------|------|-----------|------------------------------------|----------------------|----------------|---------------------|
|             | Female parent                        | Male parent | Mid-parent value | $\bar{X} \pm \sigma$                 | CV   | Extremum  | X/P                                | Less than low parent | Between parent | Greater than parent |
| CH          | 3.34                                 | 3.39        | 3.37             | 3.8±0.5                              | 0.12 | 2.65-5.21 | 88.0                               | 12.5                 | 10.0           | 77.5                |
| CY          | 3.34                                 | 4.42        | 3.88             | 3.7±0.4                              | 0.11 | 2.78-4.74 | 105.4                              | 21.0                 | 67.9           | 11.1                |
| CQ          | 3.34                                 | 2.84        | 3.09             | 3.7±0.4                              | 0.11 | 2.63-4.90 | 82.6                               | 3.8                  | 17.5           | 78.8                |
| YQ          | 4.42                                 | 2.84        | 3.63             | 4.6±0.7                              | 0.14 | 2.91-6.30 | 78.2                               | 10.0                 | 32.5           | 57.5                |
| YH          | 4.42                                 | 4.57        | 4.49             | 5.2±0.7                              | 0.13 | 3.73-6.84 | 86.5                               | 11.3                 | 12.5           | 76.3                |
| YF          | 4.42                                 | 3.37        | 3.90             | 5.0±0.7                              | 0.15 | 3.27-6.65 | 78.6                               | 6.3                  | 23.8           | 70.0                |
| QF          | 2.84                                 | 3.37        | 3.11             | 4.8±0.6                              | 0.12 | 3.18-6.10 | 65.3                               | 11.3                 | 10.0           | 78.8                |
| QY          | 2.84                                 | 4.42        | 3.63             | 4.2±0.8                              | 0.18 | 2.45-5.55 | 87.2                               | 8.8                  | 52.9           | 38.3                |
| QS          | 2.84                                 | 5.21        | 4.03             | 4.8±1.3                              | 0.27 | 2.55-7.46 | 83.4                               | 8.5                  | 61.7           | 29.8                |
| HY          | 4.57                                 | 4.42        | 4.50             | 4.9±0.8                              | 0.16 | 2.91-7.25 | 92.0                               | 25.0                 | 12.5           | 62.5                |
| HF          | 4.57                                 | 3.37        | 3.97             | 5.3±0.6                              | 0.12 | 3.72-6.77 | 74.7                               | 13.0                 | 9.5            | 77.5                |
| YY          | 3.39                                 | 4.42        | 3.91             | 4.1±0.7                              | 0.18 | 2.62-6.03 | 95.6                               | 18.6                 | 53.4           | 28.0                |
| Average     |                                      |             |                  |                                      |      |           | 84.8                               | 12.5                 | 30.3           | 57.2                |

Table S6. Genetic statistical analysis of the ray florets number of hybrids.

| Combination | Number of ray florets of parents |             |                  | Number of ray florets of hybrids |      |          | Comparison of hybrids and parents% |                      |                |                     |
|-------------|----------------------------------|-------------|------------------|----------------------------------|------|----------|------------------------------------|----------------------|----------------|---------------------|
|             | Female parent                    | Male parent | Mid-parent value | $\bar{X} \pm \sigma$             | CV   | Extremum | X/P                                | Less than low parent | Between parent | Greater than parent |
| CH          | 93                               | 19          | 56               | 76.7±32.4                        | 0.43 | 24-185   | 73.1                               | 30.0                 | 41.3           | 28.8                |
| CY          | 93                               | 75          | 84               | 78.9±40.4                        | 0.52 | 23-222   | 106.5                              | 55.0                 | 16.3           | 28.8                |
| CQ          | 93                               | 24          | 58.5             | 88.9±37.8                        | 0.43 | 24-189   | 65.8                               | 18.8                 | 45.0           | 36.3                |
| YQ          | 75                               | 24          | 51               | 73.6±37.0                        | 0.51 | 20-198   | 69.3                               | 30.0                 | 25.0           | 45.0                |
| YH          | 75                               | 85          | 80               | 106±36.3                         | 0.34 | 32-197   | 75.4                               | 22.5                 | 8.8            | 68.8                |
| YF          | 75                               | 29          | 52               | 76.5±34.2                        | 0.45 | 20-199   | 67.9                               | 10.0                 | 45.0           | 45.0                |
| QF          | 24                               | 29          | 26.5             | 33.6±13.6                        | 0.41 | 17-107   | 79.0                               | 23.8                 | 21.3           | 55.0                |
| QY          | 24                               | 75          | 49.5             | 48.2±29.2                        | 0.62 | 20-144   | 102.7                              | 20.6                 | 61.8           | 17.6                |
| QS          | 24                               | 46          | 35               | 26.1±6.8                         | 0.27 | 15-51    | 134.3                              | 40.4                 | 40.4           | 19.2                |
| HY          | 85                               | 75          | 80               | 71.0±56.0                        | 0.79 | 20-210   | 112.7                              | 60.0                 | 7.5            | 32.5                |
| HF          | 85                               | 29          | 57               | 47.4±25.7                        | 0.54 | 21-161   | 120.2                              | 22.5                 | 65.0           | 12.5                |
| YY          | 19                               | 75          | 47               | 60.3±26.8                        | 0.45 | 19-153   | 78.0                               | 36.6                 | 37.8           | 25.6                |
| Average     |                                  |             |                  |                                  |      |          | 90.4                               | 30.8                 | 34.6           | 34.6                |

Table S7. Genetic statistical analysis of the number of flowers per plant of hybrids.

| Combination | Number of flowers per plant of parents |             |                  | Number of flowers per plant of hybrids |      |          | Comparison of hybrids and parents% |                      |                |                     |
|-------------|----------------------------------------|-------------|------------------|----------------------------------------|------|----------|------------------------------------|----------------------|----------------|---------------------|
|             | Female parent                          | Male parent | Mid-parent value | $\bar{X} \pm \sigma$                   | CV   | Extremum | X/P                                | Less than low parent | Between parent | Greater than parent |
| CH          | 743                                    | 452         | 597.5            | 556.2±347.5                            | 0.63 | 76-1596  | 107.4                              | 46.3                 | 27.5           | 26.3                |
| CY          | 743                                    | 428         | 585.5            | 651.2±394.2                            | 0.61 | 89-2954  | 89.9                               | 29.6                 | 40.7           | 29.6                |
| CQ          | 743                                    | 315         | 527.5            | 526.4±381.6                            | 0.73 | 76-1896  | 100.2                              | 27.5                 | 51.3           | 21.3                |
| YQ          | 428                                    | 315         | 371.5            | 506.8±363.0                            | 0.72 | 27-1960  | 73.3                               | 30.0                 | 20.0           | 50.0                |
| YH          | 428                                    | 337         | 382.5            | 285.7±202.8                            | 0.71 | 40-1346  | 133.9                              | 66.3                 | 13.8           | 20.0                |
| YF          | 428                                    | 289         | 358.5            | 303.0±262.0                            | 0.87 | 22-1240  | 118.3                              | 56.3                 | 12.5           | 31.3                |
| QF          | 315                                    | 289         | 302              | 559.0±449.2                            | 0.81 | 37-2620  | 54.0                               | 22.5                 | 8.8            | 68.8                |
| QY          | 315                                    | 428         | 371.5            | 672.6±394.7                            | 0.60 | 50-1592  | 55.2                               | 20.6                 | 8.8            | 70.6                |
| QS          | 315                                    | 124         | 219.5            | 224.9±156.3                            | 0.70 | 14-662   | 97.6                               | 27.7                 | 38.3           | 34.0                |
| HY          | 337                                    | 428         | 382.5            | 501.9±489.0                            | 0.98 | 47-2440  | 76.2                               | 40.0                 | 22.5           | 37.5                |
| HF          | 337                                    | 289         | 313              | 335.5±224.1                            | 0.67 | 12-952   | 93.3                               | 47.5                 | 11.3           | 41.3                |
| YY          | 452                                    | 428         | 440              | 601.4±296.5                            | 0.50 | 104-1752 | 73.2                               | 26.8                 | 3.7            | 69.5                |
| Average     |                                        |             |                  |                                        |      |          | 89.4                               | 36.7                 | 21.6           | 41.7                |

Table S8. Genetic statistics of plant form of hybrids.

| Combination | Female parent | Male parent | Number of plants in F <sub>1</sub> generation | Separation of plant form of hybrid hybrids% |      |      |      |
|-------------|---------------|-------------|-----------------------------------------------|---------------------------------------------|------|------|------|
|             |               |             |                                               | I                                           | II   | III  | IIII |
| CH          | I             | II          | 80                                            | 16.3                                        | 43.8 | 32.5 | 7.5  |
| CY          | I             | II          | 80                                            | 15.0                                        | 42.5 | 37.5 | 5.0  |
| CQ          | I             | IIII        | 78                                            | 18.8                                        | 38.8 | 32.5 | 10.0 |
| YQ          | II            | IIII        | 76                                            | 17.5                                        | 25.0 | 43.8 | 13.8 |
| YH          | II            | II          | 78                                            | 23.8                                        | 11.3 | 52.5 | 12.5 |
| YF          | II            | III         | 76                                            | 15.0                                        | 5.0  | 57.5 | 22.5 |
| QF          | IIII          | III         | 80                                            | 7.5                                         | 40.0 | 36.3 | 16.3 |
| QY          | IIII          | II          | 33                                            | 8.8                                         | 29.4 | 55.9 | 5.9  |
| QS          | IIII          | III         | 44                                            | 8.5                                         | 12.8 | 51.1 | 27.7 |
| HY          | II            | II          | 76                                            | 8.8                                         | 30.0 | 52.5 | 8.8  |
| HF          | II            | III         | 78                                            | 15.0                                        | 13.8 | 52.5 | 18.8 |
| YY          | II            | II          | 81                                            | 15.9                                        | 35.4 | 37.8 | 11.0 |
| Total       |               |             |                                               | 14.2                                        | 27.3 | 45.2 | 13.3 |

Table S9. Genetic statistical analysis of branching intensity of hybrids.

| Combination | Female parent | Male parent | Number of plants in F <sub>1</sub> generation | Separation of branching intensity of hybrid hybrids% |      |      |
|-------------|---------------|-------------|-----------------------------------------------|------------------------------------------------------|------|------|
|             |               |             |                                               | I                                                    | II   | III  |
| CH          | I             | II          | 80                                            | 56.3                                                 | 31.3 | 12.5 |
| CY          | I             | I           | 80                                            | 31.3                                                 | 53.8 | 15.0 |
| CQ          | I             | III         | 78                                            | 32.5                                                 | 48.8 | 18.8 |
| YQ          | II            | III         | 76                                            | 46.3                                                 | 27.5 | 26.3 |
| YH          | II            | I           | 78                                            | 52.5                                                 | 33.8 | 13.8 |
| YF          | II            | II          | 76                                            | 33.8                                                 | 57.5 | 8.8  |
| QF          | III           | II          | 80                                            | 20.0                                                 | 55.0 | 25.0 |
| QY          | III           | I           | 33                                            | 41.2                                                 | 52.9 | 5.9  |
| QS          | III           | II          | 44                                            | 19.1                                                 | 44.7 | 36.2 |
| HY          | I             | I           | 76                                            | 31.3                                                 | 27.5 | 41.3 |
| HF          | I             | II          | 78                                            | 47.5                                                 | 27.5 | 25.0 |
| YY          | II            | I           | 81                                            | 70.7                                                 | 18.3 | 11.0 |
| Total       |               |             |                                               | 42.6                                                 | 39.1 | 18.3 |

Table S10. Genetic statistics of flower color of hybrids.

| Combination | Female parent | Male parent | Number of plants in F <sub>1</sub> generation | Separation of flower color of hybrid hybrids |       |      |      |        |        |             |               |            |
|-------------|---------------|-------------|-----------------------------------------------|----------------------------------------------|-------|------|------|--------|--------|-------------|---------------|------------|
|             |               |             |                                               | Yellow                                       | White | Pink | Red  | Purple | Orange | Pink-purple | Orange-yellow | Orange-red |
| CH          | Yellow        | Purple      | 80                                            | 6                                            | 17    | 3    | 10   | 12     | 4      | 2           | 5             | 21         |
| CY          | Yellow        | Red         | 80                                            | 6                                            | 13    | 4    | 6    | 21     | 7      | 4           | 8             | 11         |
| CQ          | Yellow        | Orange-red  | 78                                            | 24                                           | 0     | 0    | 9    | 0      | 17     | 0           | 19            | 9          |
| YQ          | Red           | Orange-red  | 76                                            | 6                                            | 0     | 0    | 28   | 0      | 2      | 0           | 11            | 29         |
| YH          | Red           | Red         | 78                                            | 2                                            | 0     | 0    | 50   | 3      | 7      | 0           | 6             | 10         |
| YF          | Red           | Pink-purple | 76                                            | 1                                            | 3     | 12   | 19   | 17     | 6      | 1           | 3             | 14         |
| QF          | Orange-red    | Pink-purple | 80                                            | 5                                            | 4     | 16   | 13   | 14     | 0      | 4           | 4             | 20         |
| QY          | Orange-red    | Red         | 33                                            | 6                                            | 1     | 2    | 2    | 3      | 6      | 1           | 3             | 9          |
| QS          | Orange-red    | Orange      | 44                                            | 15                                           | 0     | 2    | 11   | 2      | 1      | 0           | 6             | 7          |
| HY          | Red           | Red         | 76                                            | 16                                           | 0     | 6    | 22   | 1      | 7      | 2           | 7             | 15         |
| HF          | Red           | Pink-purple | 78                                            | 1                                            | 0     | 6    | 32   | 22     | 0      | 14          | 0             | 3          |
| YY          | Purple        | Red         | 81                                            | 0                                            | 0     | 4    | 24   | 34     | 5      | 0           | 7             | 7          |
| Ratio%      |               |             |                                               | 10.2                                         | 4.4   | 6.4  | 26.3 | 15.0   | 7.2    | 3.3         | 9.2           | 18.0       |
